# Supplementary material
Source: publisher figshare collection journal article supplement (https://sage.figshare.com/ndownloader/files/20718180)
Supplement: Supplementary file 1 [file 20718180]

**Appendix Table 1. Medications with Cognitive Side Effects Consumed by U.S. Adults Aged 60+ in NHANES from 1999-2000 to 2015-2016**

|                                                  |                                 |               |
|--------------------------------------------------|---------------------------------|---------------|
| Acamprosate                                      | Fluorouracil                    | Pantoprazole  |
| Alprazolam                                       | Fluoxetine                      | Phenobarbital |
| Amitriptyline                                    | Fluvastatin                     | Phenytoin     |
| Amitriptyline Hydrochloride/Perphenazine         | Heparin                         | Pitavastatin  |
| Atorvastatin                                     | Hydrochlorothiazide/Propranolol | Pravastatin   |
| Baclofen                                         | Ibuprofen                       | Prednisolone  |
| Bendroflumethiazide/Nadolol                      | Interferon Alfa-2A              | Pregabalin    |
| Benztropine                                      | Isoniazid                       | Progesterone  |
| Ciprofloxacin                                    | Ketoprofen                      | Promethazine  |
| Clomipramine                                     | Lamotrigine                     | Propafenone   |
| Clonazepam                                       | Leuprolide                      | Propranolol   |
| Conjugated Estrogens                             | Levetiracetam                   | Pyridoxine    |
| Cyclopentolate                                   | Levofloxacin                    | Quinidine     |
| Cyclophosphamide                                 | Lorazepam                       | Rabeprazole   |
| Cyclosporine                                     | Lovastatin                      | Ramelteon     |
| Cyproheptadine                                   | Meclizine                       | Ribavirin     |
| Dexlansoprazole                                  | Mefloquine                      | Rosuvastatin  |
| Diazepam                                         | Methocarbamol                   | Scopolamine   |
| Diltiazem                                        | Methotrexate                    | Simvastatin   |
| Dorzolamide                                      | Methyldopa                      | Tamsulosin    |
| Dronabinol                                       | Montelukast                     | Temazepam     |
| Enzalutamide                                     | Moxifloxacin                    | Testosterone  |
| Esomeprazole                                     | Naproxen                        | Tolterodine   |
| Estazolam                                        | Niacin/Simvastatin              | Topiramate    |
| Esterified Estrogens                             | Nifedipine                      | Trazodone     |
| Estradiol                                        | Nortriptyline                   | Tretinoin     |
| Estradiol/Norethindrone                          | Ofloxacin                       | Triazolam     |
| Estradiol/Norgestimate                           | Omeprazole                      | Valproic Acid |
| Conjugated Estrogens/Medroxyprogesterone Acetate | Omeprazole/Sodium Bicarbonate   | Zaleplon      |
| Estrogens/Methyltestosterone                     | Oxcarbazepine                   | Zolmitriptan  |
| Estropipate                                      | Oxybutynin                      | Zolpidem      |
| Etidronate                                       |                                 |               |

**Appendix Table 2. Top 25 Medications with the Largest Change in Utilization Among U.S. Adults Aged 60+ from 1999-2000 to 2015-2016. Data Source: NHANES 1999-2000 to 2015-2016.**

| Medications          | Weighted Prevalence of Utilization Among U.S. Adults Aged 60+ (%) |           |           |           |           |           |           |           |           | Difference Between 2015-2016 and 1999-2000 (%) | P-value for Trend <sup>a</sup> |
|----------------------|-------------------------------------------------------------------|-----------|-----------|-----------|-----------|-----------|-----------|-----------|-----------|------------------------------------------------|--------------------------------|
|                      | 1999-2000                                                         | 2001-2002 | 2003-2004 | 2005-2006 | 2007-2008 | 2009-2010 | 2011-2012 | 2013-2014 | 2015-2016 |                                                |                                |
| Survey cycles:       |                                                                   |           |           |           |           |           |           |           |           |                                                |                                |
| Simvastatin          | 5.81                                                              | 7.20      | 8.09      | 10.74     | 13.45     | 18.94     | 18.68     | 14.97     | 14.35     | 8.54                                           | <0.001                         |
| Atorvastatin         | 7.36                                                              | 10.67     | 13.38     | 16.06     | 14.44     | 9.40      | 9.63      | 15.05     | 14.99     | 7.63                                           | <0.001                         |
| Conjugated estrogens | 7.08                                                              | 10.35     | 3.18      | 1.60      | 2.12      | 1.33      | 1.07      | 0.83      | 0.60      | -6.48                                          | <0.001                         |
| Omeprazole           | 4.48                                                              | 4.48      | 2.44      | 4.34      | 7.23      | 9.29      | 9.95      | 12.44     | 10.43     | 5.94                                           | <0.001                         |
| Pravastatin          | 2.45                                                              | 2.56      | 3.46      | 1.60      | 2.46      | 2.74      | 4.82      | 5.60      | 7.12      | 4.67                                           | <0.001                         |
| Rosuvastatin         | 0.00                                                              | 0.00      | 0.51      | 0.87      | 2.47      | 3.24      | 3.37      | 6.77      | 4.54      | 4.54                                           | <0.001                         |
| Gabapentin           | 0.55                                                              | 1.98      | 2.18      | 1.84      | 2.79      | 3.12      | 3.60      | 4.67      | 4.34      | 3.79                                           | <0.001                         |
| Tamsulosin           | 0.76                                                              | 1.24      | 2.54      | 2.61      | 2.56      | 3.03      | 3.53      | 4.34      | 4.43      | 3.67                                           | <0.001                         |
| Esomeprazole         | 0.00                                                              | 0.00      | 3.56      | 4.53      | 4.75      | 3.96      | 2.81      | 2.94      | 3.28      | 3.28                                           | 0.11                           |
| Nifedipine           | 3.38                                                              | 2.52      | 2.22      | 1.90      | 1.27      | 1.86      | 1.18      | 0.85      | 0.83      | -2.55                                          | <0.001                         |
| Pantoprazole         | 0.05                                                              | 1.32      | 2.96      | 2.25      | 2.04      | 2.02      | 1.60      | 3.69      | 2.58      | 2.53                                           | <0.001                         |
| Montelukast          | 0.44                                                              | 0.94      | 1.57      | 1.50      | 1.90      | 2.43      | 1.27      | 1.91      | 2.97      | 2.53                                           | 0.001                          |
| Lovastatin           | 0.98                                                              | 1.60      | 1.73      | 3.60      | 3.16      | 4.04      | 3.25      | 3.15      | 2.90      | 1.92                                           | <0.001                         |
| Propranolol          | 2.30                                                              | 1.17      | 1.57      | 2.19      | 1.45      | 0.62      | 1.03      | 0.78      | 0.43      | -1.86                                          | 0.001                          |
| Diltiazem            | 3.89                                                              | 4.78      | 4.23      | 3.92      | 2.86      | 2.13      | 1.77      | 1.95      | 2.07      | -1.82                                          | <0.001                         |
| Pregabalin           | 0.00                                                              | 0.00      | 0.00      | 0.16      | 0.27      | 1.11      | 0.34      | 0.99      | 1.70      | 1.70                                           | <0.001                         |
| Zolpidem             | 1.01                                                              | 0.75      | 1.65      | 1.84      | 1.65      | 1.88      | 1.39      | 3.02      | 2.47      | 1.47                                           | 0.003                          |
| Fluoxetine           | 0.86                                                              | 1.31      | 1.20      | 1.34      | 2.01      | 1.69      | 0.81      | 2.70      | 2.29      | 1.44                                           | 0.01                           |
| Meclizine            | 1.87                                                              | 1.34      | 1.28      | 0.53      | 1.11      | 0.76      | 0.88      | 0.63      | 0.44      | -1.43                                          | 0.05                           |
| Fluvastatin          | 1.33                                                              | 1.04      | 1.04      | 0.96      | 0.41      | 0.02      | 0.00      | 0.00      | 0.00      | -1.33                                          | 0.01                           |
| Alprazolam           | 1.63                                                              | 1.34      | 2.36      | 2.08      | 2.63      | 1.02      | 1.88      | 3.30      | 2.89      | 1.26                                           | 0.02                           |
| Cyclosporine         | 0.00                                                              | 0.25      | 0.05      | 0.36      | 0.21      | 0.44      | 0.28      | 0.72      | 1.23      | 1.23                                           | 0.02                           |
| Clonazepam           | 0.30                                                              | 0.57      | 0.63      | 0.42      | 0.81      | 1.06      | 1.78      | 0.77      | 1.44      | 1.14                                           | 0.001                          |
| Naproxen             | 1.96                                                              | 1.47      | 1.54      | 1.55      | 1.70      | 1.15      | 1.68      | 1.41      | 0.92      | -1.04                                          | 0.83                           |
| Baclofen             | 0.02                                                              | 0.00      | 0.10      | 0.12      | 0.10      | 0.48      | 0.24      | 0.35      | 0.90      | 0.87                                           | 0.003                          |
| No. of observations  | 1834                                                              | 1872      | 1901      | 1570      | 2154      | 2073      | 1791      | 1841      | 1901      |                                                |                                |

<sup>a</sup>: P-value is obtained from logistic regression.

**Appendix Table 3. Adjusted Linear Least-Squared Regressions of Standardized Cognitive Test Scores on Utilization of Medications with Cognitive Side Effects for Adults Aged 60+.**

**Data Source: NHANES 2011-2012 and 2013-2014.**

| Outcome:                                                         | Standardized scores       |                 |                           | Composite measure                         |
|------------------------------------------------------------------|---------------------------|-----------------|---------------------------|-------------------------------------------|
|                                                                  | Word learning and recalls | Animal Fluency  | Digit Symbol Substitution | Average standardized score of three tests |
|                                                                  | Coef. (SE)                | Coef. (SE)      | Coef. (SE)                | Coef. (SE)                                |
| <b>Whether taking medications WITH cognitive side effects</b>    |                           |                 |                           |                                           |
| None (reference)                                                 |                           |                 |                           |                                           |
| 1 medication                                                     | -0.02 (0.06)              | -0.04 (0.06)    | 0.00 (0.06)               | -0.02 (0.05)                              |
| 2 medications                                                    | -0.10 (0.06)              | 0.01 (0.08)     | -0.03 (0.07)              | -0.04 (0.05)                              |
| 3+ medications                                                   | -0.24* (0.09)             | -0.15 (0.09)    | -0.27** (0.07)            | -0.22*** (0.06)                           |
| <b>Whether taking medications WITHOUT cognitive side effects</b> |                           |                 |                           |                                           |
| None (reference)                                                 |                           |                 |                           |                                           |
| 1 medication                                                     | 0.00 (0.07)               | -0.10 (0.08)    | -0.11 (0.08)              | -0.07 (0.05)                              |
| 2 medications                                                    | -0.10 (0.06)              | -0.05 (0.08)    | -0.07 (0.07)              | -0.07 (0.05)                              |
| 3+ medications                                                   | -0.07 (0.05)              | -0.07 (0.08)    | -0.17* (0.06)             | -0.10* (0.05)                             |
| <b>Race &amp; ethnicity</b>                                      |                           |                 |                           |                                           |
| Non-Hispanic White (reference)                                   |                           |                 |                           |                                           |
| Hispanic                                                         | -0.20** (0.06)            | -0.23*** (0.06) | -0.58*** (0.05)           | -0.34*** (0.05)                           |
| Non-Hispanic Black                                               | -0.15* (0.06)             | -0.49*** (0.05) | -0.65*** (0.05)           | -0.43*** (0.04)                           |
| Non-Hispanic others                                              | 0.11 (0.08)               | -0.46*** (0.10) | -0.09 (0.07)              | -0.15* (0.05)                             |
| <b>Female</b>                                                    | 0.36*** (0.04)            | 0.00 (0.05)     | 0.34*** (0.03)            | 0.23*** (0.03)                            |
| <b>Age (in years)</b>                                            | -0.05*** (0.00)           | -0.04*** (0.00) | -0.05*** (0.00)           | -0.05*** (0.00)                           |
| <b>Marital status</b>                                            |                           |                 |                           |                                           |
| Married or living with partner (reference)                       |                           |                 |                           |                                           |
| Widowed, divorced, separated                                     | -0.05 (0.04)              | 0.02 (0.05)     | -0.02 (0.04)              | -0.02 (0.03)                              |
| Never married                                                    | -0.02 (0.11)              | -0.04 (0.13)    | -0.02 (0.10)              | -0.03 (0.09)                              |
| <b>Educational attainment</b>                                    |                           |                 |                           |                                           |
| Less than high school (reference)                                |                           |                 |                           |                                           |
| High school graduate                                             | 0.05 (0.07)               | 0.13* (0.05)    | 0.39*** (0.04)            | 0.19*** (0.04)                            |
| Some college or AA degree                                        | 0.23*** (0.06)            | 0.42*** (0.05)  | 0.61*** (0.04)            | 0.42*** (0.03)                            |
| College graduate or above                                        | 0.26* (0.10)              | 0.72*** (0.08)  | 0.77*** (0.05)            | 0.59*** (0.06)                            |
| <b>Poverty</b>                                                   |                           |                 |                           |                                           |
| <100% federal guideline (reference)                              |                           |                 |                           |                                           |
| 100-199%                                                         | -0.01 (0.06)              | 0.05 (0.06)     | 0.10 (0.06)               | 0.05 (0.05)                               |
| 200-299%                                                         | 0.14 (0.08)               | 0.05 (0.09)     | 0.24** (0.06)             | 0.14* (0.05)                              |
| 300-399%                                                         | 0.18* (0.08)              | 0.08 (0.09)     | 0.41*** (0.07)            | 0.22*** (0.05)                            |
| 400-499%                                                         | 0.05 (0.09)               | 0.13 (0.08)     | 0.44*** (0.08)            | 0.21** (0.06)                             |
| 500%+                                                            | 0.17 (0.09)               | 0.13 (0.08)     | 0.38*** (0.08)            | 0.23** (0.07)                             |
| <b>Not U.S. citizen</b>                                          | -0.21** (0.07)            | -0.26* (0.11)   | -0.46*** (0.07)           | -0.31*** (0.07)                           |
| <b>Has any health insurance</b>                                  | 0.09 (0.07)               | 0.10 (0.12)     | 0.14 (0.08)               | 0.11 (0.06)                               |
| <b>Has routine place for medical care</b>                        | 0.17* (0.07)              | -0.01 (0.12)    | 0.07 (0.08)               | 0.08 (0.07)                               |
| <b>Smoking</b>                                                   |                           |                 |                           |                                           |
| Never smoked (reference)                                         |                           |                 |                           |                                           |
| Smoked 100+ cigarettes, not current smoker                       | 0.05 (0.06)               | 0.02 (0.05)     | 0.02 (0.05)               | 0.03 (0.04)                               |
| Smoked 100+ cigarettes, current smoker                           | -0.00 (0.07)              | 0.01 (0.09)     | -0.15* (0.06)             | -0.04 (0.05)                              |

|                                                    |                |                |              |                |
|----------------------------------------------------|----------------|----------------|--------------|----------------|
| <b>Depression (PHQ-9 <math>\geq 10</math>)</b>     | -0.10 (0.07)   | -0.25** (0.07) | -0.17 (0.09) | -0.17** (0.05) |
| <b>Obese (BMI <math>\geq 30</math>)</b>            | 0.09 (0.05)    | 0.07 (0.05)    | 0.06 (0.04)  | 0.07 (0.04)    |
| <b>Year fixed effect (2013-2014 vs. 2011-2012)</b> | 0.33*** (0.06) | -0.03 (0.05)   | -0.04 (0.04) | 0.09* (0.03)   |
| <b>Health conditions <sup>a</sup></b>              | Yes            | Yes            | Yes          | Yes            |
| <b>Number of observations</b>                      | 2,908          | 2,908          | 2,908        | 2,908          |

*Notes:* <sup>a</sup> Health conditions include a set of binary indicators for whether a person has ever been told by a health professional that they have asthma, arthritis, cancer, congestive heart failure, coronary heart disease, heart attack, angina, emphysema, bronchitis, stroke, diabetes, hypertension, and sleep disorder.

\* $p < 0.05$ , \*\* $p < 0.01$ , \*\*\* $p < 0.001$ . Standard errors are in parentheses. All analyses were weighted using survey weights.

**Appendix Table 4. Adjusted Logistic Regressions of Whether Cognitive Assessment Scores Are More Than One Standard Deviation Below the Mean on Utilization of Medications with Cognitive Side Effects for Adults Aged 60+. Data Source: NHANES 2011-2012 and 2013-2014.**

| Outcome:                                                         | Whether scores are one standard deviation below the mean |                |                           | Composite measure                                                          |
|------------------------------------------------------------------|----------------------------------------------------------|----------------|---------------------------|----------------------------------------------------------------------------|
|                                                                  | Word learning and recalls                                | Animal Fluency | Digit Symbol Substitution | Whether 2+ test scores are more than one standard deviation below the mean |
|                                                                  | OR (SE)                                                  | OR (SE)        | OR (SE)                   | OR (SE)                                                                    |
| <b>Whether taking medications WITH cognitive side effects</b>    |                                                          |                |                           |                                                                            |
| None (reference)                                                 |                                                          |                |                           |                                                                            |
| 1 medication                                                     | 1.38* (0.22)                                             | 0.77 (0.12)    | 1.20 (0.18)               | 0.88 (0.15)                                                                |
| 2 medications                                                    | 1.55* (0.28)                                             | 0.85 (0.13)    | 1.34 (0.29)               | 1.38 (0.23)                                                                |
| 3+ medications                                                   | 2.04* (0.64)                                             | 1.59 (0.39)    | 2.82*** (0.67)            | 2.10** (0.54)                                                              |
| <b>Whether taking medications WITHOUT cognitive side effects</b> |                                                          |                |                           |                                                                            |
| None (reference)                                                 |                                                          |                |                           |                                                                            |
| 1 medication                                                     | 0.68 (0.15)                                              | 1.10 (0.27)    | 0.98 (0.24)               | 0.92 (0.23)                                                                |
| 2 medications                                                    | 1.08 (0.25)                                              | 0.98 (0.25)    | 0.61* (0.14)              | 0.82 (0.21)                                                                |
| 3+ medications                                                   | 0.83 (0.18)                                              | 1.41 (0.33)    | 1.22 (0.28)               | 1.28 (0.27)                                                                |
| <b>Race &amp; ethnicity</b>                                      |                                                          |                |                           |                                                                            |
| Non-Hispanic White (reference)                                   |                                                          |                |                           |                                                                            |
| Hispanic                                                         | 1.60* (0.35)                                             | 1.62* (0.34)   | 4.54*** (0.77)            | 2.28** (0.56)                                                              |
| Non-Hispanic Black                                               | 1.39 (0.30)                                              | 3.23*** (0.55) | 5.18*** (0.83)            | 3.25*** (0.82)                                                             |
| Non-Hispanic others                                              | 0.69 (0.18)                                              | 2.46*** (0.53) | 0.99 (0.19)               | 1.18 (0.32)                                                                |
| <b>Female</b>                                                    | 0.60* (0.11)                                             | 0.88 (0.15)    | 0.51*** (0.09)            | 0.70* (0.12)                                                               |
| <b>Age (in years)</b>                                            | 1.13*** (0.02)                                           | 1.09*** (0.01) | 1.15*** (0.01)            | 1.14*** (0.02)                                                             |
| <b>Marital status</b>                                            |                                                          |                |                           |                                                                            |
| Married or living with partner (reference)                       |                                                          |                |                           |                                                                            |
| Widowed, divorced, separated                                     | 0.93 (0.17)                                              | 1.12 (0.18)    | 1.21 (0.22)               | 1.14 (0.14)                                                                |
| Never married                                                    | 1.20 (0.45)                                              | 1.18 (0.34)    | 1.61 (0.51)               | 1.66 (0.60)                                                                |
| <b>Educational attainment</b>                                    |                                                          |                |                           |                                                                            |
| Less than high school (reference)                                |                                                          |                |                           |                                                                            |
| High school graduate                                             | 1.06 (0.21)                                              | 0.75 (0.12)    | 0.37*** (0.05)            | 0.61* (0.12)                                                               |
| Some college or AA degree                                        | 0.74 (0.13)                                              | 0.41*** (0.07) | 0.20*** (0.03)            | 0.29*** (0.06)                                                             |
| College graduate or above                                        | 0.51** (0.12)                                            | 0.34*** (0.07) | 0.15*** (0.03)            | 0.21*** (0.04)                                                             |
| <b>Poverty</b>                                                   |                                                          |                |                           |                                                                            |
| <100% federal guideline (reference)                              |                                                          |                |                           |                                                                            |
| 100-199%                                                         | 0.88 (0.17)                                              | 0.93 (0.17)    | 0.91 (0.17)               | 1.01 (0.21)                                                                |
| 200-299%                                                         | 0.73 (0.21)                                              | 0.91 (0.23)    | 0.58** (0.11)             | 0.64 (0.18)                                                                |
| 300-399%                                                         | 0.51* (0.14)                                             | 0.67 (0.14)    | 0.25*** (0.06)            | 0.44* (0.13)                                                               |
| 400-499%                                                         | 0.58 (0.19)                                              | 0.65 (0.23)    | 0.30*** (0.09)            | 0.47* (0.17)                                                               |
| 500%+                                                            | 0.65 (0.23)                                              | 0.60 (0.18)    | 0.39** (0.12)             | 0.51 (0.23)                                                                |
| <b>Not U.S. citizen</b>                                          | 1.37 (0.37)                                              | 1.82 (0.76)    | 3.75*** (0.89)            | 2.07* (0.55)                                                               |
| <b>Has any health insurance</b>                                  | 0.90 (0.25)                                              | 1.07 (0.27)    | 0.76 (0.19)               | 0.79 (0.20)                                                                |
| <b>Has routine place for medical care</b>                        | 0.55 (0.23)                                              | 0.70 (0.22)    | 0.43* (0.13)              | 0.42* (0.14)                                                               |

**Smoking**

|                                                    |                |                |              |                |
|----------------------------------------------------|----------------|----------------|--------------|----------------|
| Never smoked (reference)                           |                |                |              |                |
| Smoked 100+ cigarettes, not current smoker         | 0.61* (0.11)   | 1.00 (0.14)    | 0.85 (0.12)  | 0.72* (0.11)   |
| Smoked 100+ cigarettes, current smoker             | 0.85 (0.22)    | 1.11 (0.22)    | 1.42 (0.38)  | 1.19 (0.25)    |
| <b>Depression (PHQ-9 &gt;= 10)</b>                 | 1.48 (0.34)    | 1.87*** (0.29) | 1.69* (0.42) | 2.18*** (0.40) |
| <b>Obese (BMI &gt;= 30)</b>                        | 0.79 (0.13)    | 0.80 (0.12)    | 0.74 (0.14)  | 0.72 (0.12)    |
| <b>Year fixed effect (2013-2014 vs. 2011-2012)</b> | 0.55*** (0.09) | 0.89 (0.09)    | 1.00 (0.14)  | 0.81 (0.13)    |
| <b>Health conditions <sup>a</sup></b>              | Yes            | Yes            | Yes          | Yes            |
| <b>Number of observations</b>                      | 2,908          | 2,908          | 2,908        | 2,908          |

*Notes:* <sup>a</sup> Health conditions include a set of binary indicators for whether a person has ever been told by a health professional that they have asthma, arthritis, cancer, congestive heart failure, coronary heart disease, heart attack, angina, emphysema, bronchitis, stroke, diabetes, hypertension, and sleep disorder.

\*p<0.05, \*\*p<0.01, \*\*\*p<0.001. Standard errors are in parentheses. All analyses were weighted using survey weights.

**Appendix Figure 1: Marginal Effects of Medications With/Without Cognitive Side Effects on Global Cognitive Score by Age Among Adults Aged 60+. Data Source: NHANES 2011-2012 and 2013-2014.**

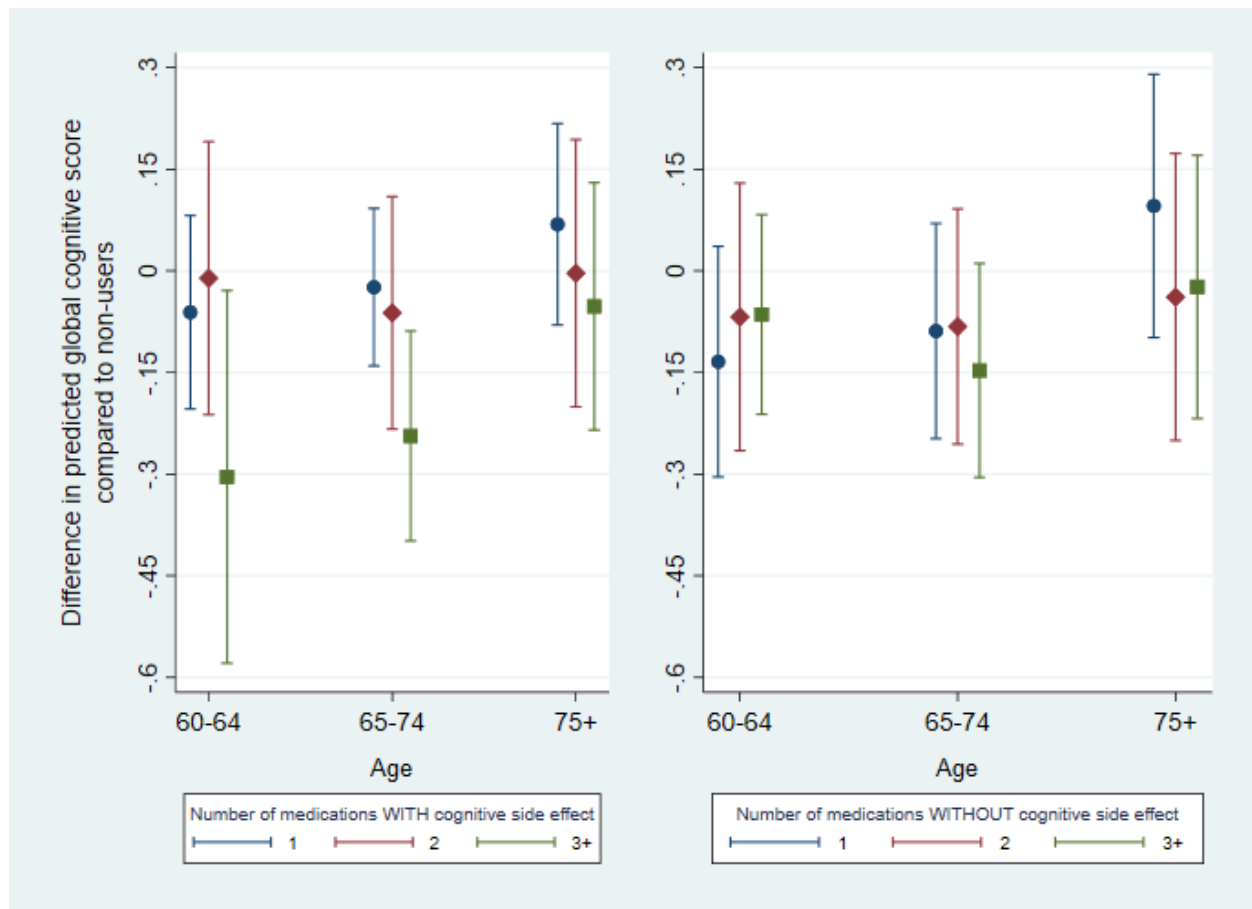

*Notes:* The marginal effects were calculated from the linear regression of the global cognitive score (average of the three standardized cognitive assessment scores) on the interactions between medications with/without cognitive side effects and age groups (60-64, 65-74, and 75+), while controlling for other covariates such as race, gender, marital status, educational attainment, poverty, citizenship, health insurance coverage, whether the person has a routine place for medical care, smoking status, binary indicator for each self-reported health condition (asthma, arthritis, cancer, congestive heart failure, coronary heart disease, heart attack, angina, emphysema, bronchitis, stroke, diabetes, hypertension, and sleep disorder), depression (PHQ-9 scale), obesity (BMI of at least 30), and time trends.

**Appendix Figure 2: Marginal Effects of Medications With/Without Cognitive Side Effects on Global Cognitive Score by Gender Among Adults Aged 60+. Data Source: NHANES 2011-2012 and 2013-2014.**

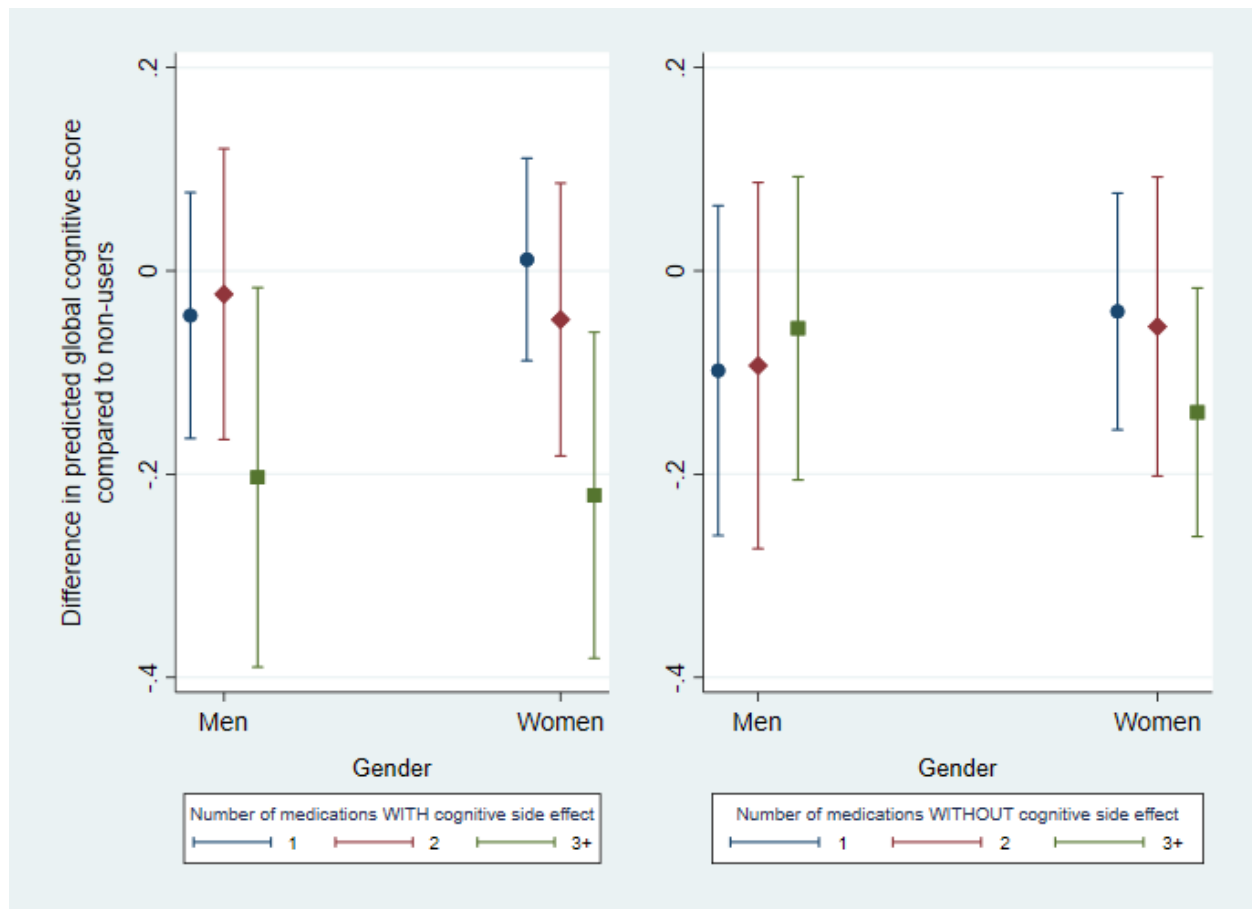

*Notes:* The marginal effects were calculated from the linear regression of the global cognitive score (average of the three standardized cognitive assessment scores) on the interactions between medications with/without cognitive side effects and gender, while controlling for other covariates such as race, age, marital status, educational attainment, poverty, citizenship, health insurance coverage, whether the person has a routine place for medical care, smoking status, binary indicator for each self-reported health condition (asthma, arthritis, cancer, congestive heart failure, coronary heart disease, heart attack, angina, emphysema, bronchitis, stroke, diabetes, hypertension, and sleep disorder), depression (PHQ-9 scale), obesity (BMI of at least 30), and time trends.



### Appendix Figure 3: Marginal Effects of Medications With/Without Cognitive Side Effects on Global Cognitive Score by Educational Attainment Among Adults Aged 60+. Data

Source: NHANES 2011-2012 and 2013-2014.

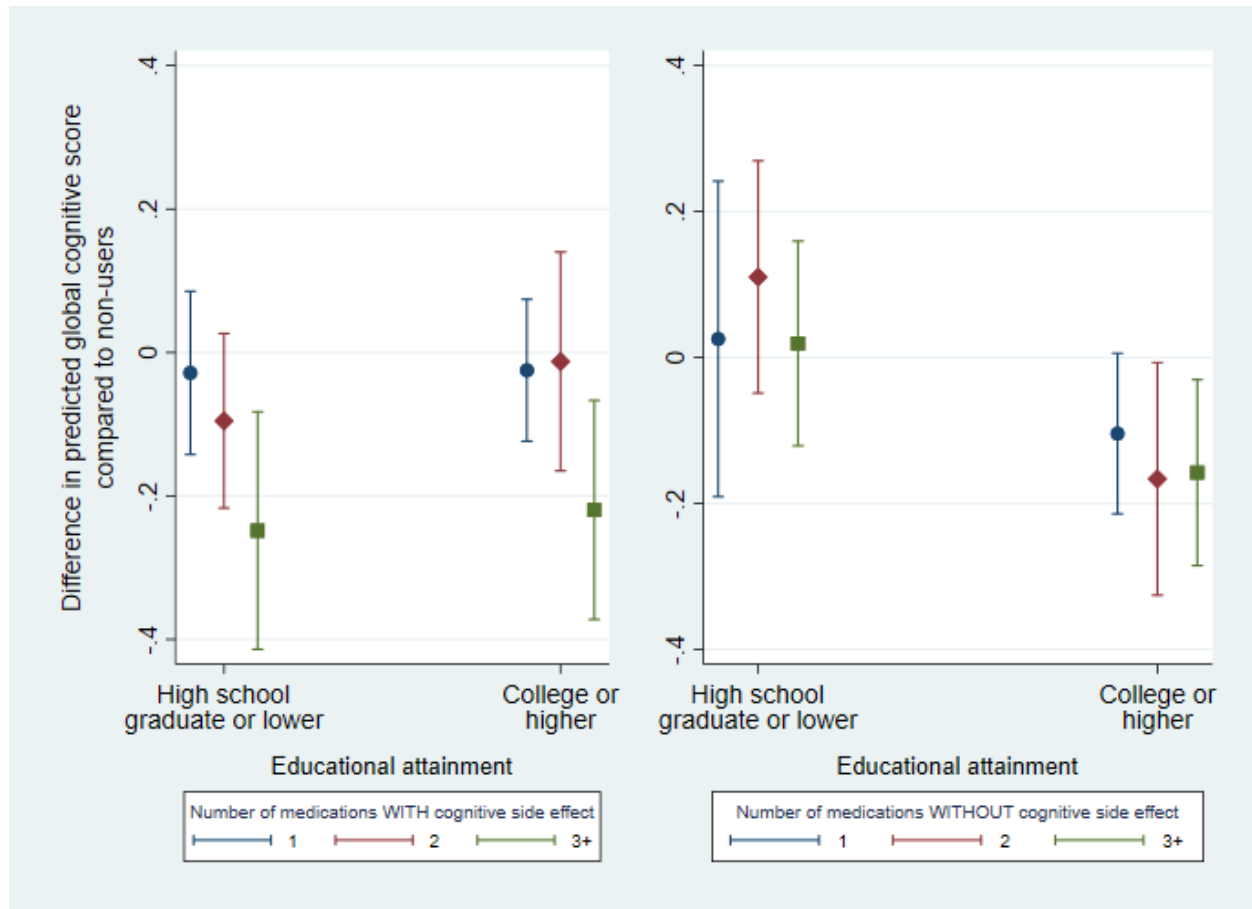

*Notes:* The marginal effects were calculated from the linear regression of the global cognitive score (average of the three standardized cognitive assessment scores) on the interactions between medications with/without cognitive side effects and educational attainment (high school graduate or lower and college or higher), while controlling for other covariates such as race, gender, age, marital status, poverty, citizenship, health insurance coverage, whether the person has a routine place for medical care, smoking status, binary indicator for each self-reported health condition (asthma, arthritis, cancer, congestive heart failure, coronary heart disease, heart attack, angina, emphysema, bronchitis, stroke, diabetes, hypertension, and sleep disorder), depression (PHQ-9 scale), obesity (BMI of at least 30), and time trends.

**Appendix Figure 4: Marginal Effects of Medications With/Without Cognitive Side Effects on Global Cognitive Score by Race/Ethnicity Among Adults Aged 60+. Data Source: NHANES 2011-2012 and 2013-2014.**

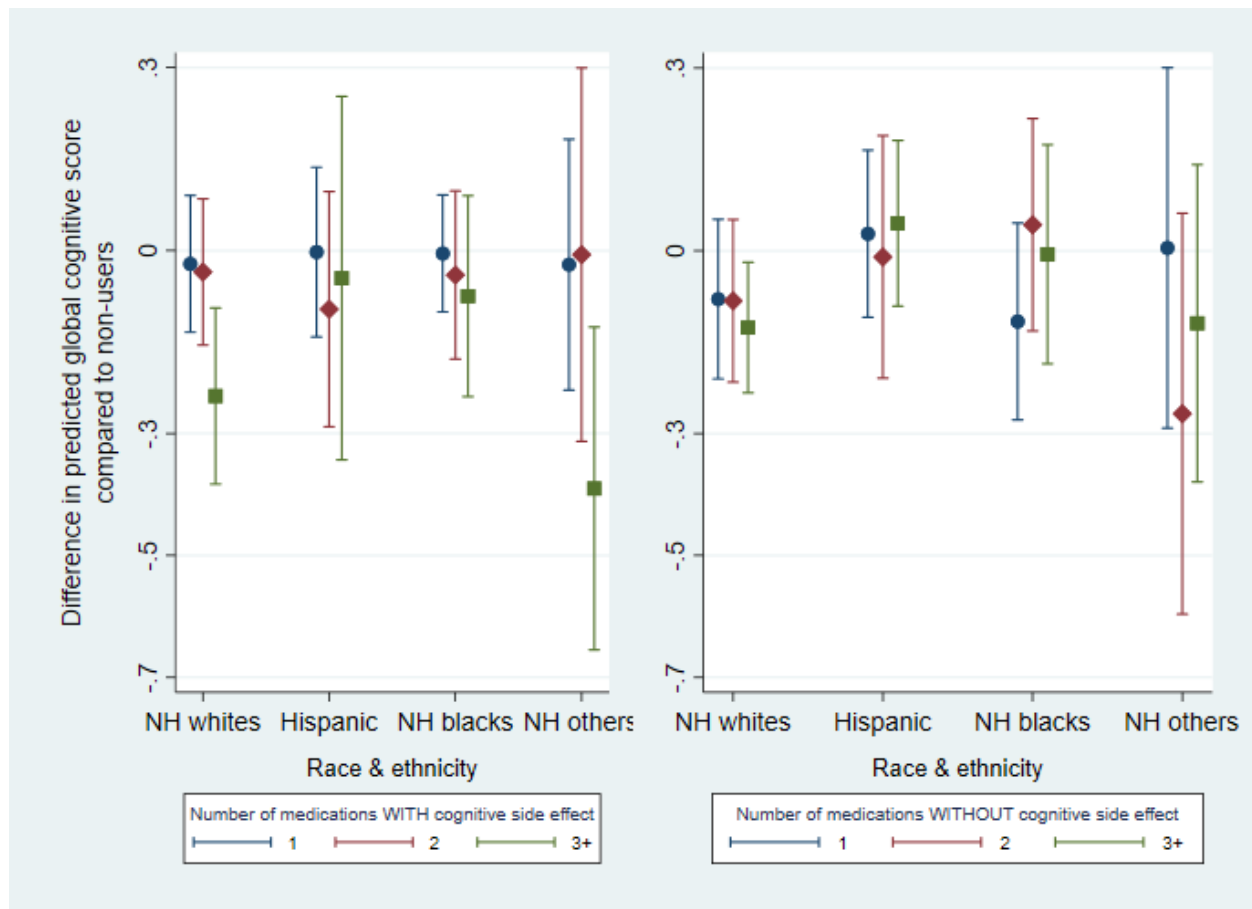

*Notes:* The marginal effects were calculated from the linear regression of the global cognitive score (average of the three standardized cognitive assessment scores) on the interactions between medications with/without cognitive side effects and race/ethnicity (non-Hispanic whites, Hispanic, non-Hispanic blacks, and non-Hispanic others), while controlling for other covariates such as age, gender, marital status, educational attainment, poverty, citizenship, health insurance coverage, whether the person has a routine place for medical care, smoking status, binary indicator for each self-reported health condition (asthma, arthritis, cancer, congestive heart failure, coronary heart disease, heart attack, angina, emphysema, bronchitis, stroke, diabetes, hypertension, and sleep disorder), depression (PHQ-9 scale), obesity (BMI of at least 30), and time trends.

NH: non-Hispanic.

**Appendix Figure 5: Marginal Effects of Medications With/Without Cognitive Side Effects on Global Cognitive Score by Marital Status Among Adults Aged 60+. Data Source: NHANES 2011-2012 and 2013-2014.**

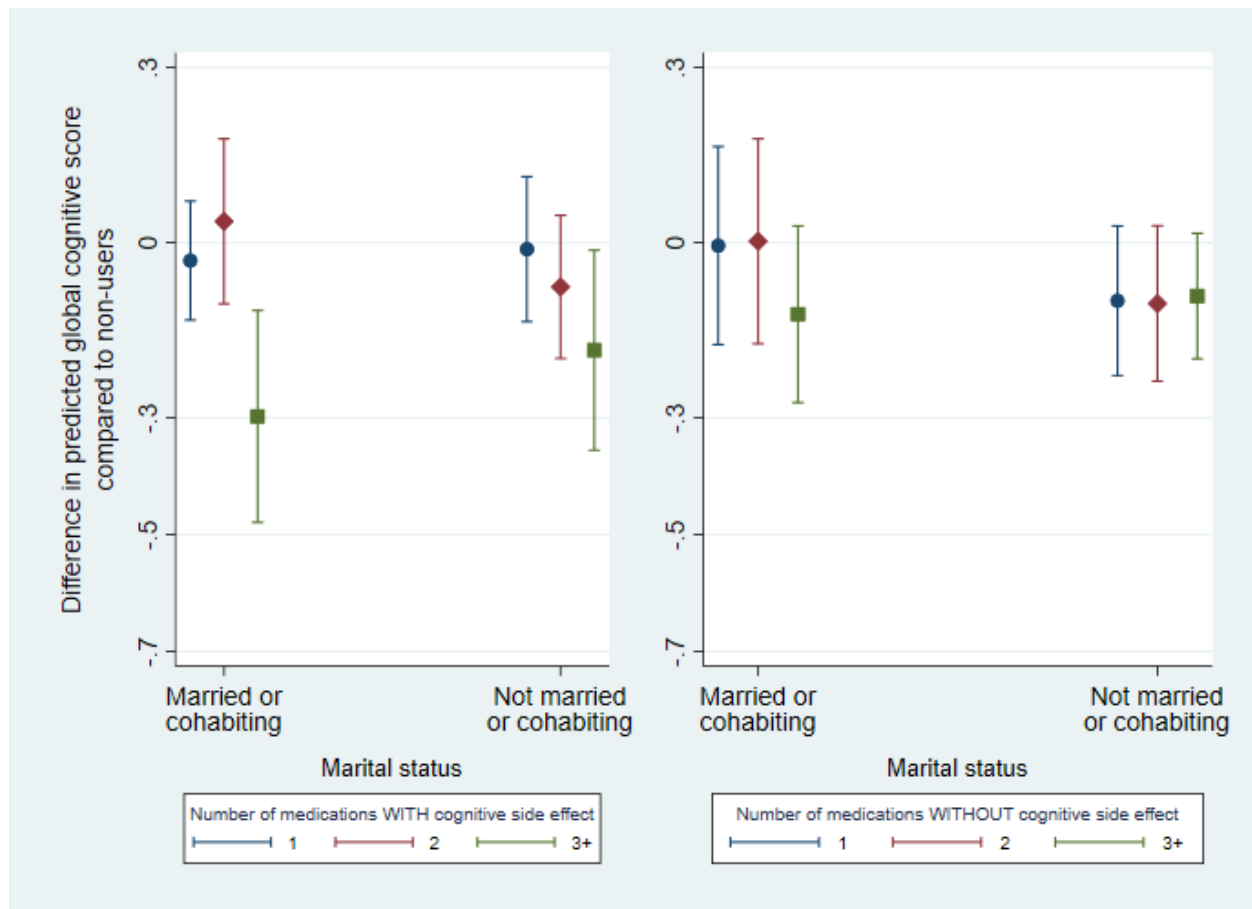

*Notes:* The marginal effects were calculated from the linear regression of the global cognitive score (average of the three standardized cognitive assessment scores) on the interactions between medications with/without cognitive side effects and marital status (married or cohabiting and not married or cohabiting), while controlling for other covariates such as race, age, gender, educational attainment, poverty, citizenship, health insurance coverage, whether the person has a routine place for medical care, smoking status, binary indicator for each self-reported health condition (asthma, arthritis, cancer, congestive heart failure, coronary heart disease, heart attack, angina, emphysema, bronchitis, stroke, diabetes, hypertension, and sleep disorder), depression (PHQ-9 scale), obesity (BMI of at least 30), and time trends.

**Appendix Table 5. Most Common Combinations of Medications with Cognitive Side Effects Among Adults Aged 60+ Who Consumed At Least Three Medications with Cognitive Side Effects. Data Source: NHANES 1999-2000 to 2015-2016.**

| <b>Combinations of medications with cognitive side effects</b>                                    | <b>N</b> | <b>%</b> |
|---------------------------------------------------------------------------------------------------|----------|----------|
| <b>Anticonvulsants - antihyperlipidemic agents - proton pump inhibitors</b>                       | 66       | 5.31     |
| Omeprazole-gabapentin-simvastatin                                                                 |          |          |
| Omeprazole-atorvastatin-gabapentin                                                                |          |          |
| Omeprazole-gabapentin-pravastatin                                                                 |          |          |
| Pantoprazole-gabapentin-simvastatin                                                               |          |          |
| Pantoprazole-atorvastatin-gabapentin                                                              |          |          |
| Omeprazole-pregabalin-atorvastatin                                                                |          |          |
| Esomeprazole-gabapentin-simvastatin                                                               |          |          |
| Rabeprazole-atorvastatin-gabapentin                                                               |          |          |
| <b>Antiadrenergic agents - antihyperlipidemic agents - proton pump inhibitors</b>                 | 37       | 3.2      |
| Omeprazole-tamsulosin-simvastatin                                                                 |          |          |
| Omeprazole-tamsulosin-atorvastatin                                                                |          |          |
| Pantoprazole-tamsulosin-simvastatin                                                               |          |          |
| Pantoprazole-tamsulosin-atorvastatin                                                              |          |          |
| Omeprazole-tamsulosin-pravastatin                                                                 |          |          |
| Esomeprazole-tamsulosin-simvastatin                                                               |          |          |
| Esomeprazole-tamsulosin-rosuvastatin                                                              |          |          |
| <b>Sex hormones - antihyperlipidemic agents - proton pump inhibitors</b>                          | 23       | 3.02     |
| Conjugated estrogens-omeprazole-atorvastatin                                                      |          |          |
| Omeprazole-simvastatin-testosterone                                                               |          |          |
| Esomeprazole-estrogens methyltestosterone-atorvastatin                                            |          |          |
| Conjugated estrogens-omeprazole-simvastatin                                                       |          |          |
| Conjugated estrogens-esomeprazole-atorvastatin                                                    |          |          |
| <b>Anxiolytics, sedatives, and hypnotics - antihyperlipidemic agents - proton pump inhibitors</b> | 33       | 2.91     |
| Alprazolam-omeprazole-simvastatin                                                                 |          |          |
| Alprazolam-esomeprazole-atorvastatin                                                              |          |          |
| Esomeprazole-atorvastatin-zolpidem                                                                |          |          |
| Alprazolam-omeprazole-lovastatin                                                                  |          |          |
| Alprazolam-omeprazole-atorvastatin                                                                |          |          |
| <b>Antidepressants - antihyperlipidemic agents - proton pump inhibitors</b>                       | 26       | 2.86     |
| Omeprazole-trazodone-simvastatin                                                                  |          |          |
| Omeprazole-fluoxetine-simvastatin                                                                 |          |          |
| Pantoprazole-fluoxetine-simvastatin                                                               |          |          |
| Pantoprazole-amitriptyline-simvastatin                                                            |          |          |
| Pantoprazole-amitriptyline-fluoxetine-lovastatin                                                  |          |          |
| <b>Anticonvulsants - antidepressants - antihyperlipidemic agents</b>                              | 26       | 2.02     |
| Amitriptyline-diazepam-simvastatin                                                                |          |          |
| Amitriptyline-atorvastatin-gabapentin                                                             |          |          |
| Trazodone-gabapentin-simvastatin                                                                  |          |          |
| Trazodone-diazepam-simvastatin                                                                    |          |          |
| Clonazepam-fluoxetine-simvastatin                                                                 |          |          |
| <b>Antiarrhythmic agents - antihyperlipidemic agents - proton pump inhibitors</b>                 | 27       | 1.87     |
| Diltiazem-omeprazole-simvastatin                                                                  |          |          |
| Diltiazem-omeprazole-atorvastatin                                                                 |          |          |
| Diltiazem-esomeprazole-simvastatin                                                                |          |          |

|                                                                                            |    |      |
|--------------------------------------------------------------------------------------------|----|------|
| Omeprazole-propranolol-simvastatin                                                         |    |      |
| Omeprazole-phenytoin-simvastatin                                                           |    |      |
| <b>Leukotriene modifiers - antihyperlipidemic agents - proton pump inhibitors</b>          | 16 | 1.59 |
| Montelukast-omeprazole-atorvastatin                                                        |    |      |
| Montelukast-pantoprazole-simvastatin                                                       |    |      |
| Montelukast-omeprazole-simvastatin                                                         |    |      |
| Montelukast-omeprazole-rosuvastatin                                                        |    |      |
| Montelukast-rabeprazole-simvastatin                                                        |    |      |
| <b>Antidepressants - antihyperlipidemic agents - anxiolytics, sedatives, and hypnotics</b> | 12 | 1.5  |
| Alprazolam-amitriptyline-atorvastatin                                                      |    |      |
| Fluoxetine-rosuvastatin-zolpidem                                                           |    |      |
| Atorvastatin-fluoxetine-zolpidem                                                           |    |      |
| Amitriptyline-simvastatin-zaleplon                                                         |    |      |
| Amitriptyline-rosuvastatin-zolpidem                                                        |    |      |
| <b>Analgesics - antihyperlipidemic agents - proton pump inhibitors</b>                     | 19 | 1.27 |
| Omeprazole-ibuprofen-simvastatin                                                           |    |      |
| Esomeprazole-naproxen-atorvastatin                                                         |    |      |
| Pantoprazole-ibuprofen-simvastatin                                                         |    |      |
| Omeprazole-ibuprofen-pravastatin                                                           |    |      |
| Naproxen-omeprazole-rosuvastatin                                                           |    |      |

---

Notes: Estimates were based on 1,153 adults aged 60+ who consumed at least three medications with cognitive side effects in the past 30 days using the pooled NHANES data from 1999-2000 to 2015-2016. Frequency was unweighted while percentage was weighted using survey weights.
